Figure S1

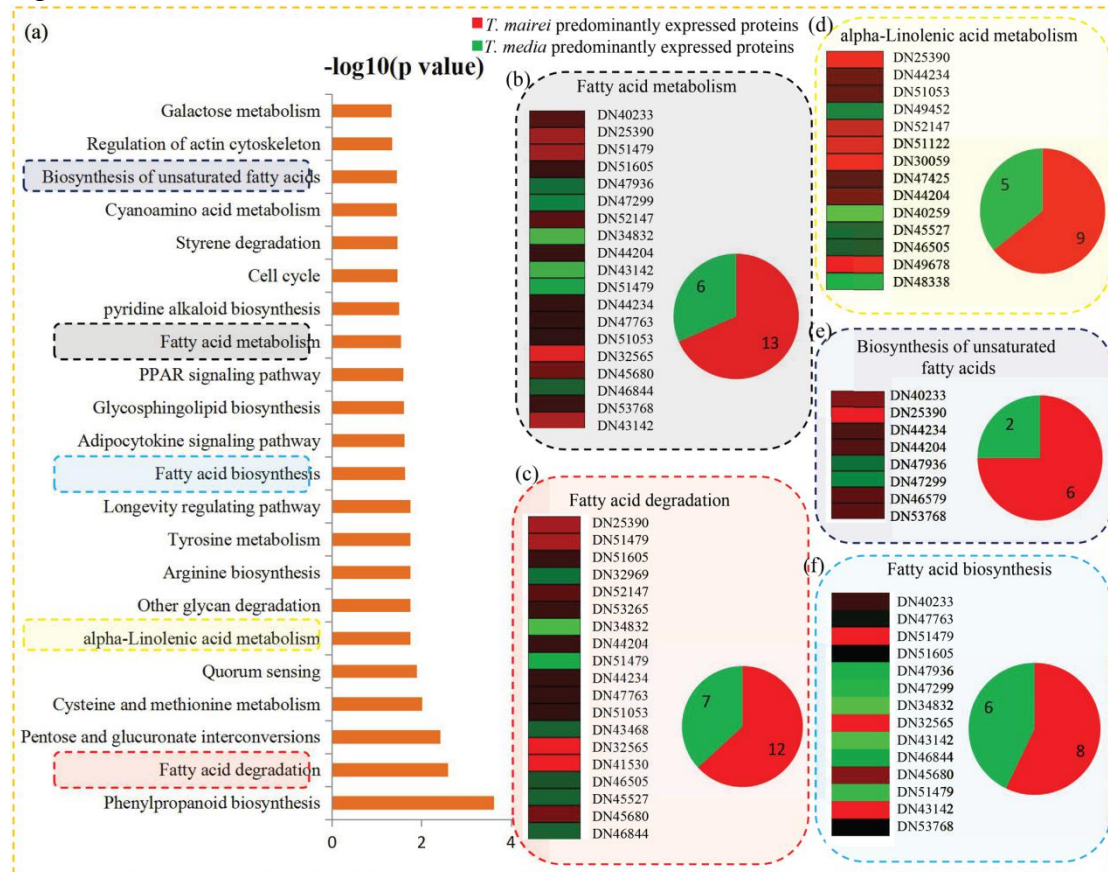

Fig. S1 KEGG analysis of all DEPs between *T. media* and *T. mairei*. (a) The top enrichment KEGG terms of DEPs. (b) The DEPs in “Fatty acid metabolism” term; (c) The DEPs in “Fatty acid degradation” term; (d) The DEPs in “alpha-Linolenic acid metabolism” term; (e) The DEPs in “Biosynthesis of unsaturated fatty acids” term; (f) The DEPs in “Fatty acids biosynthesis” term.
